# Supplementary material
Source: publisher site journal article supplement (https://www.dovepress.com/get_supplementary_file.php?f=495240.docx)
Supplement: Supplementary file 1 [file get_supplementary_file.php]

**Supplementary Table 1** Risk factors for 28-day mortality in patients with CRPA BSI

| Characteristics | No-survivor  (n =57) | Survivor  (n =55) | Total (n=112) | *P* Value |
| --- | --- | --- | --- | --- |
| Underlying diseases or conditions | | | | |
| Cardiovascular disease | 11 (19.3%) | 9 (16.4%) | 20 (17.9%) | 0.685 |
| Hypertension | 10 (17.5%) | 14 (25.5%) | 24 (21.4%) | 0.358 |
| Cerebrovascular diseases | 11 (19.3%) | 7 (12.7%) | 18 (16.1%) | 0.344 |
| Chronic kidney disease | 4 (7.0%) | 4 (7.3%) | 8 (7.1%) | 0.958 |
| Chronic lung diseases | 11 (19.3%) | 6 (10.9%) | 17 (15.2%) | 0.216 |
| Chronic liver disease | 0 (0.0%) | 1 (1.8%) | 1 (0.9%) | 0.307 |
| Diabetes mellitus | 12 (21.1%) | 12 (21.8%) | 24 (21.4%) | 0.921 |
| Solid malignant tumor | 9 (15.8%) | 5 (9.1%) | 14 (12.5%) | 0.284 |
| Hematological disease | 18 (31.6%) | 24 (43.6%) | 42 (37.5%) | 0.188 |
| Transplantation | 13 (22.8%) | 9 (16.4%) | 22 (19.6%) | 0.391 |
| Previous hospitalization | 46 (80.7%) | 47 (85.5%) | 93 (83.0%) | 0.503 |
| Pre-infection within CRPA | 17 (29.8%) | 19 (34.5%) | 36 (32.1%) | 0.593 |
| Previous staying in ICU | 18 (31.6%) | 10 (18.2) | 28 (25%) | 0.102 |
| antibiotics exposure within 90 days | | | | |
| Cephalosporins | 23 (40.4%) | 16 (29.1%) | 39 (34.8%) | 0.211 |
| Carbapenems | 19 (33.3%) | 10 (18.2) | 29 (25.9%) | 0.067 |
| β-lactam and β-Lactamase inhibitors | 25 (43.9%) | 25 (45.5%) | 50 (44.6%) | 0.865 |
| Aminoglycosides | 2 (3.5%) | 2 (3.6%) | 4 (3.6%) | 0.971 |
| Fluoroquinolones | 21 (36.8%) | 15 (27.3%) | 36 (32.1%) | 0.278 |
| Glycopeptides | 10 (17.5%) | 14 (25.5%) | 24 (21.4%) | 0.308 |
| Previous treatments administered | | | | |
| Urinary catheter | 23 (40.4%) | 13 (23.6%) | 36 (32.1%) | 0.058 |
| PICC | 23 (40.4%) | 25 (45.5%) | 48 (42.9%) | 0.585 |
| Previous surgery | 19 (33.3%) | 13 (23.6%) | 32 (28.6) | 0.354 |
| Glucocorticoid therapy | 32 (56.1%) | 25 (45.5%) | 57 (50.9) | 0.258 |
| Immunosuppressive therapy | 9 (15.8%) | 7 (12.7%) | 16 (14.3%) | 0.643 |
| Total length of hospital stay, days, median (IQR) | 43.6 (16,47) | 51.5 (16.5,55) | 47.5 (16,52) | 0.473 |
| The treatments after BSI | | | | |
| Active antimicrobial therapy | 49 (86.0%) | 48 (87.3%) | 97 (86.6%) | 0.839 |
| Carbapenems | 16 (28.1%) | 12 (21.8%) | 28 (25%) | 0.445 |
| β-lactam and β-Lactamase inhibitors | 31 (54.4%) | 35 (63.6%) | 66 (58.9%) | 0.320 |
| Aminoglycosides | 9 (15.8%) | 15 (27.3%) | 24 (21.4%) | 0.139 |
| Fluoroquinolones | 15 (26.3%) | 16 (29.1%) | 31 (27.7%) | 0.743 |
| Colistin | 32 (56.1%) | 25 (45.5%) | 57 (50.9) | 0.258 |
| Ceftazidime Avibactam | 1 (1.8%) | 2 (3.6%) | 3 (2.7%) | 0.537 |
| surgery | 4 (7.0%) | 1 (1.8%) | 5 (4.5%) | 0.183 |
| Glucocorticoid therapy | 29 (50.9%) | 20 (36.4%) | 49 (43.8%) | 0.122 |
| Immunosuppressive therapy | 3 (5.3%) | 2 (3.6%) | 5 (4.5%) | 0.677 |
| Chemotherapy or radiotherapy | 0 (0.0%) | 1 (1.8%) | 1 (0.9%) | 0.307 |
| Laboratory examinations | | | | |
| WBC<4×109, median (IQR) | 0.83 (0.10,1.00) | 0.79 (0.19,1.00) | 0.81 (0.12,1.00) | 0.876 |
| WBC>10×109, median (IQR) | 19.51 (14.72,22.45) | 16.41 (11.65,18.07) | 17.92 (12.22,20.52) | 0.262 |
| Platelet, median (IQR)a | 73 (11,90) | 99 (11,169) | 85 (11,123) | 0.200 |
| Albumin, median (IQR)b | 29.0 (25.9,31.9) | 28.4 (25.3,32) | 28.7 (25.8,31.9) | 0.502 |
| C-reactive protein,  Median (IQR)c | 143.3 (100.8,214.2) | 129.3 (74.4,186.8) | 136.4 (76.3,198.8) | 0.930 |
| MDRPA | 42 (73.7%) | 34 (61.8%) | 76 (67.9%) | 0.179 |
| DTRPA | 24 (42.1%) | 19 (34.5%) | 43 (38.4%) | 0.411 |

**Abbreviations:** ICU, intensive care unit; PICC, peripherally inserted central catheter; IQR, interquartile range; BSI, bloodstream infection; CRPA, carbapenem-resistant *Pseudomonas aeruginosa*; MDRPA, multidrug resistance *Pseudomonas aeruginosa*; DTRPA, difficult-to-treat resistance *Pseudomonas aeruginosa;*

a, ×109 cells/L; b, g/L; c, mg/L

**Supplementary data 1** Power analysis

**Tests for Two Proportions**

**Numeric Results for Testing Two Proportions using the Z-Test with Unpooled Variance**

H0: O1/O2 = 1 vs. H1: O1/O2 = OR1 ≠ 1.

**Target Actual O.R.**

**Power Power* N1 N2 N P1 P2 OR1 Alpha**

0.90 0.90006 68 68 136 0.6477 0.3800 3.000 0.0500

* Power was computed using the normal approximation method.

**References**

Chow, S.C., Shao, J., and Wang, H. 2008. Sample Size Calculations in Clinical Research, Second Edition. Chapman & Hall/CRC. Boca Raton, Florida.

D'Agostino, R.B., Chase, W., and Belanger, A. 1988. 'The Appropriateness of Some Common Procedures for Testing the Equality of Two Independent Binomial Populations', The American Statistician, August 1988, Volume 42 Number 3, pages 198-202.

Fleiss, J. L., Levin, B., and Paik, M.C. 2003. Statistical Methods for Rates and Proportions. Third Edition. John Wiley & Sons. New York.

Lachin, John M. 2000. Biostatistical Methods. John Wiley & Sons. New York.

Machin, D., Campbell, M., Fayers, P., and Pinol, A. 1997. Sample Size Tables for Clinical Studies, 2nd Edition. Blackwell Science. Malden, Mass.

Ryan, Thomas P. 2013. Sample Size Determination and Power. John Wiley & Sons. Hoboken, New Jersey.

**Report Definitions**

Target Power is the desired power value (or values) entered in the procedure. Power is the probability of rejecting a false null hypothesis.

Actual Power is the power obtained in this scenario. Because N1 and N2 are discrete, this value is often (slightly) larger than the target power.

N1 and N2 are the number of items sampled from each population.

N is the total sample size, N1 + N2.

P1 is the proportion for Group 1 at which power and sample size calculations are made. This is the treatment or experimental group.

P2 is the proportion for Group 2. This is the standard, reference, or control group.

OR1 is the odds ratio [P1/(1-P1)] / [P2/(1-P2)] assumed for power and sample size calculations.

Alpha is the probability of rejecting a true null hypothesis.

**Summary Statements**

Group sample sizes of 68 in group 1 and 68 in group 2 achieve 90.006% power to detect an odds ratio of the group proportions of 3.000. The proportion in group 1 (the treatment group) is assumed to be 0.3800 under the null hypothesis and 0.6477 under the alternative hypothesis. The proportion in group 2 (the control group) is 0.3800. The test statistic used is the two-sided Z-Test with unpooled variance. The significance level of the test is 0.0500.

**Dropout-Inflated Sample Size**

**Dropout-Inflated Expected**

**Enrollment Number of**

**──── Sample Size ──── ──── Sample Size ──── ───── Dropouts ─────**

**Dropout Rate N1 N2 N N1' N2' N' D1 D2 D**

20% 68 68 136 85 85 170 17 17 34

**Tests for Two Proportions**

**Definitions**

Dropout Rate (DR) is the percentage of subjects (or items) that are expected to be lost at random during the course of the study and for whom no response data will be collected (i.e. will be treated as "missing").

N1, N2, and N are the evaluable sample sizes at which power is computed. If N1 and N2 subjects are evaluated out of the N1' and N2' subjects that are enrolled in the study, the design will achieve the stated power.

N1', N2', and N' are the number of subjects that should be enrolled in the study in order to end up with N1, N2, and N evaluable subjects, based on the assumed dropout rate. After solving for N1 and N2, N1' and N2' are calculated by inflating N1 and N2 using the formulas N1' = N1 / (1 - DR) and N2' = N2 / (1 - DR), with N1' and N2' always rounded up. (See Julious, S.A. (2010) pages 52-53, or Chow, S.C., Shao, J., and Wang, H.(2008) pages 39-40.)

D1, D2, and D are the expected number of dropouts. D1 = N1' - N1, D2 = N2' - N2, and D = D1 + D2.

**Procedure Input Settings**

**Autosaved Template File**

C:\Users\Dongluyan\Documents\PASS 15\Procedure Templates\Autosave\Tests for Two Proportions - Autosaved 2024_12_29-20_19_29.t359

**Design Tab**

Solve For: Sample Size

Power Calculation Method: Normal Approximation

Alternative Hypothesis: Two-Sided

Test Type: Z-Test (Unpooled)

Power: 0.90

Alpha: 0.05

Group Allocation: Equal (N1 = N2)

Input Type: Odds Ratios

OR1 (Odds Ratio|H1 = O1/O2): 3.0

P2 (Group 2 Proportion): 0.38
